# Supplementary material for: Highly Concentrated, Conductive, Defect-free Graphene Ink for Screen-Printed Sensor Application
Source: PubMed Central journal article supplement (PMC8006523; doi:10.1007/s40820-021-00617-3), 2021-03-08
Supplement: 40820_2021_617_MOESM1_ESM.pdf [file 40820_2021_617_MOESM1_ESM.pdf]

Supporting Information for

## Highly Concentrated, Conductive, Defect-free Graphene Ink for Screen-Printed Sensor Application

Dong Seok Kim<sup>1, #</sup>, Jae-Min Jeong<sup>2, #</sup>, Hong Jun Park<sup>1, #</sup>, Yeong Kyun Kim,<sup>1</sup> Kyoung G. Lee<sup>3, \*</sup>, Bong Gill Choi<sup>1, \*</sup>

<sup>1</sup>Department of Chemical Engineering, Kangwon National University, Samcheok, Gangwon-do 25913, Republic of Korea

<sup>2</sup>Resources Utilization Research Center, Korea Institute of Geoscience and Mineral Resources, Daejeon 34132, Republic of Korea

<sup>3</sup>Nano-Bio Application Team, National Nanofab Center, Daejeon 34141, Republic of Korea

#Dong Seok Kim, Jae-Min Jeong, and Hong Jun Park contributed equally to this work

\*Corresponding authors. E-mail: [kglee@nmfc.re.kr](mailto:kglee@nmfc.re.kr) (K.G.L), [bgchoi@kangwon.ac.kr](mailto:bgchoi@kangwon.ac.kr) (B.G.C)

### Supplementary Tables and Figures

**Table 1** Comparison of fluid dynamic process and other previously reported solution-based methods in terms of exfoliation performance

| Method                        | Solvent                                           | Time       | Yield         | Concentration      | $I_D/I_G$   | Refs.            |
|-------------------------------|---------------------------------------------------|------------|---------------|--------------------|-------------|------------------|
| Shear exfoliation             | NMP                                               | 4 h        | ~3.35%        | ~0.07 mg/mL        | 0.18        | [S1]             |
| Blender                       | Anionic/nonionic surfactant                       | 4 h        | ~1%           | ~1 mg/mL           | 0.3~        | [S2]             |
| high pressure homogenize      | DMF                                               | 10 min     | ~2.68%        | ~0.084 mg/mL       | High defect | [S3]             |
| Bath sonication               | Pluronic P-123 (aq.)                              | 5 h        | N/A           | ~1.5 mg/mL         | 0.1~        | [S4]             |
| Bath sonication               | NMP                                               | 462 h      | ~4%           | ~1.2 mg/mL         | N/A         | [S5]             |
| Tip ultrasonication           | [Bmim][Tf <sub>2</sub> N]                         | ~1 h       | N/A           | ~0.95 mg/mL        | 6~          | [S6]             |
| Tip ultrasonication           | DNA (aq.)                                         | ~6 h       | N/A           | ~2.29 mg/mL        | 0.61~       | [S7]             |
| Planetary mill                | Ammonia borane (NH <sub>3</sub> BH <sub>3</sub> ) | ~4 h       | ~25%          | N/A                | 0.5~        | [S8]             |
| Bath sonication               | Sodium cholate (aq.)                              | ~430 h     | ~2            | ~0.3 mg/mL         | 0.4         | [S9]             |
| <b>Fluid-dynamics Process</b> | <b>Terpineol/Ethanol with 10 wt% of EC</b>        | <b>1 h</b> | <b>~53.5%</b> | <b>~47.5 mg/mL</b> | <b>0.21</b> | <b>This work</b> |

NMP; *N*-methyl-2-pyrrolidone, DMF; Dimethylformamide, DNA; deoxyribonucleic acid, TPU; Thermoplastic polyurethane.

**Table 2** Comparison of fluid dynamic process for ex-Gr ink and other previously reported solution-based methods in terms of preparation method, process time, printing method, and conductivity

| Method                        | Formula (solvent, surfactant)         | Time       | Printing method | Conductivity [S/m]                        | Refs.            |
|-------------------------------|---------------------------------------|------------|-----------------|-------------------------------------------|------------------|
| Sonication                    | Deionized water                       | 2 h        | Inkjet          | $8.74 \times 10^2$<br>(Only RGO)          | [S10]            |
| Ultrasonication               | NMP                                   | 9 h        | Inkjet          | 100<br>(Only graphene)                    | [S11]            |
| Tip sonication                | NMP                                   | 7 h        | Inkjet          | $3 \times 10^3$<br>(Only graphene)        | [S12]            |
| Ultrasonication               | 0.1% (w/v) EC in cyclohexanone        | 30 min     | Inkjet          | $9.24 \times 10^3$<br>(EC:Gr~1.5:8.5)     | [S13]            |
| Electrochemical               | DMF                                   | 1 h        | Inkjet          | $2.5 \times 10^3$<br>(Only GNPs)          | [S14]            |
| Ultrasonication               | 5 w/v% EC in toluene:ethanol          | 20-40 h    | Inkjet          | 100<br>(EC:Gr~1.2:8.8)                    | [S15]            |
| Ball milling                  | 10 wt% PTFE in ethanol                | 1 h        | Screen          | 13<br>(PTFE:GNPs/PANI=1:9)                | [S16]            |
| High-shear mixing             | Copolymer in isopropanol              | 1 h        | Screen          | $1.33 \times 10^3$<br>(Binder:Gr~7.5:2.5) | [S17]            |
| Three-roll milling            | 75 wt% EC in isopropanol              | 1 h        | Screen          | $1.7 \times 10^3$<br>(EC:Gr~2.3:7.7)      | [S18]            |
| <b>Fluid-dynamics Process</b> | <b>10 wt% EC in Terpineol/Ethanol</b> | <b>2 h</b> | <b>Screen</b>   | $1.49 \times 10^4$<br><b>(EC:Gr~1:9)</b>  | <b>This work</b> |

NMP; *N*-methyl-2-pyrrolidone, EC; ethyl cellulose, DMF; *N,N*-dimethylformamide, PTFE; polytetrafluoroethylene, RGO; reduced graphene oxide, Gr; graphene, GNPs; graphene nanoplatelet.

**Table 3** Comparison of our thermal annealing condition and other previously reported annealing processes

| Materials              | Solvent                                   | Annealing Technique (Condition) | Conductivity [S/m]     | Refs. |
|------------------------|-------------------------------------------|---------------------------------|------------------------|-------|
| Graphene               | DMF/terpineol                             | Thermal (400°C)                 | $5 \times 10^{-6}$     | [S15] |
| Reduced graphene oxide | Water, Etylene glycol                     | Plasma (138°C, Ar)              | 2[kΩ q <sup>-1</sup> ] | [S19] |
| Graphene               | Acetone/Ethyl lactate                     | Thermal (100°C)                 | $4 \times 10^4$        | [S20] |
| Graphene               | Water/Carboxymethyl cellulose sodium salt | Thermal (70°C)                  | $4.23 \times 10^4$     | [S21] |

|                 |                                       |                                |                                      |                  |
|-----------------|---------------------------------------|--------------------------------|--------------------------------------|------------------|
| Graphene        | 2,3-butenediol/Isopropanol            | Thermal (300°C)                | $8.7 \times 10^3$                    | [S22]            |
| Graphene        | NMP/Vinyl acetate/Isopropanol         | Thermal (100°C)                | $4 \times 10^4$                      | [S23]            |
| Graphene        | NMP/Ethyl cellulose                   | Thermal (35°C)                 | $6.5 \times 10^{-10}$                | [S24]            |
| Graphene        | Ethylene cellulose/ethanol            | Thermal (250°C)                | $2.5 \times 10^4$                    | [S25]            |
| <b>Graphene</b> | <b>10 wt% EC in Terpineol/Ethanol</b> | <b>Thermal (225°C, Vacuum)</b> | <b><math>1.49 \times 10^4</math></b> | <b>This work</b> |

PVP; polyvinylpyrrolidone, NMP; *N*-methyl-2-pyrrolidone, DMF; *N,N*-dimethylformamide.

**Table 4** Selectivity coefficients of various interfering ions for sodium sensor determined by SSM

| Ion (J)   | $\log K_{IJ}^{pot}$ | $K_{IJ}^{pot}$        |
|-----------|---------------------|-----------------------|
| $Ca^{2+}$ | -5.890              | $1.29 \times 10^{-6}$ |
| $Mg^{2+}$ | -3.915              | $1.22 \times 10^{-4}$ |
| $K^+$     | -3.869              | $1.35 \times 10^{-4}$ |
| $H^+$     | -1.925              | $1.19 \times 10^{-2}$ |
| $NH_4^+$  | -5.142              | $7.20 \times 10^{-6}$ |

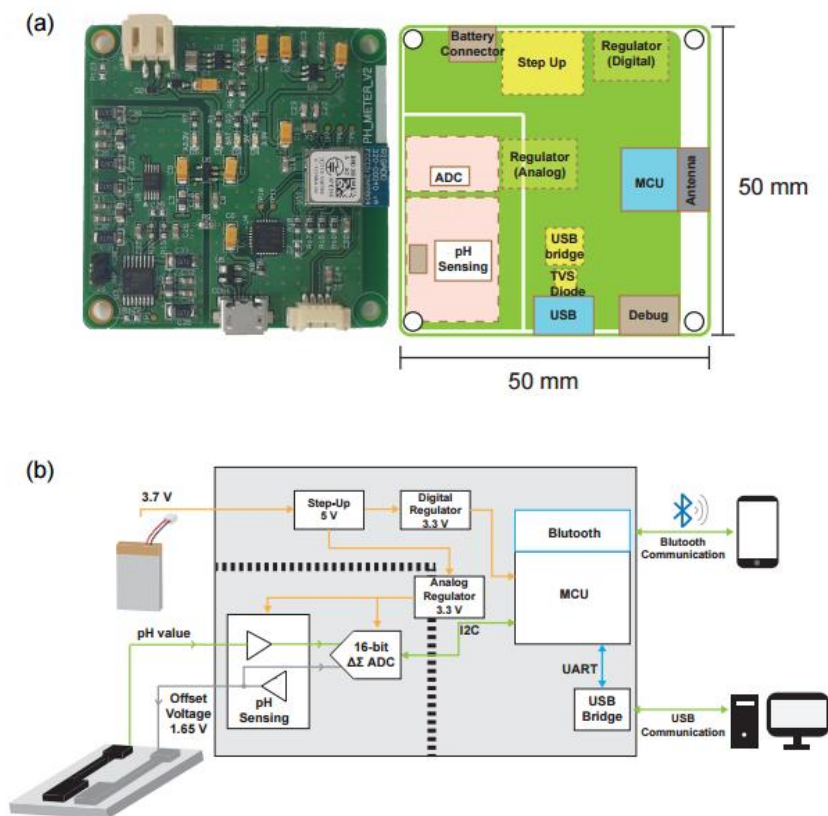

**Fig. S1 a** A photograph image and schematic of PCB. **b** A schematic diagram of the PCB system

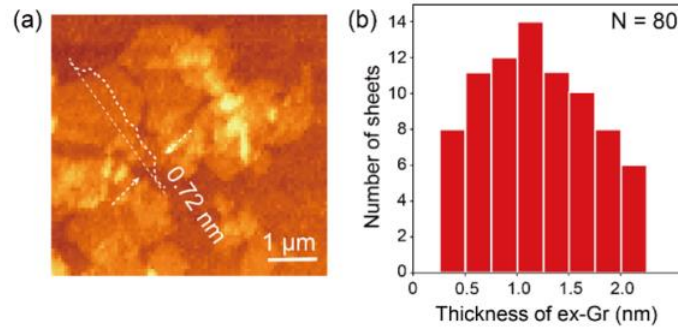

**Fig. S2** **a** AFM image and **b** thickness distribution of ex-Gr

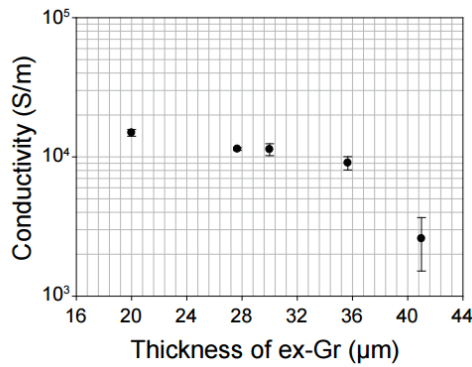

**Fig. S3** Conductivity of ex-Gr conductor as a function of ex-Gr film thickness

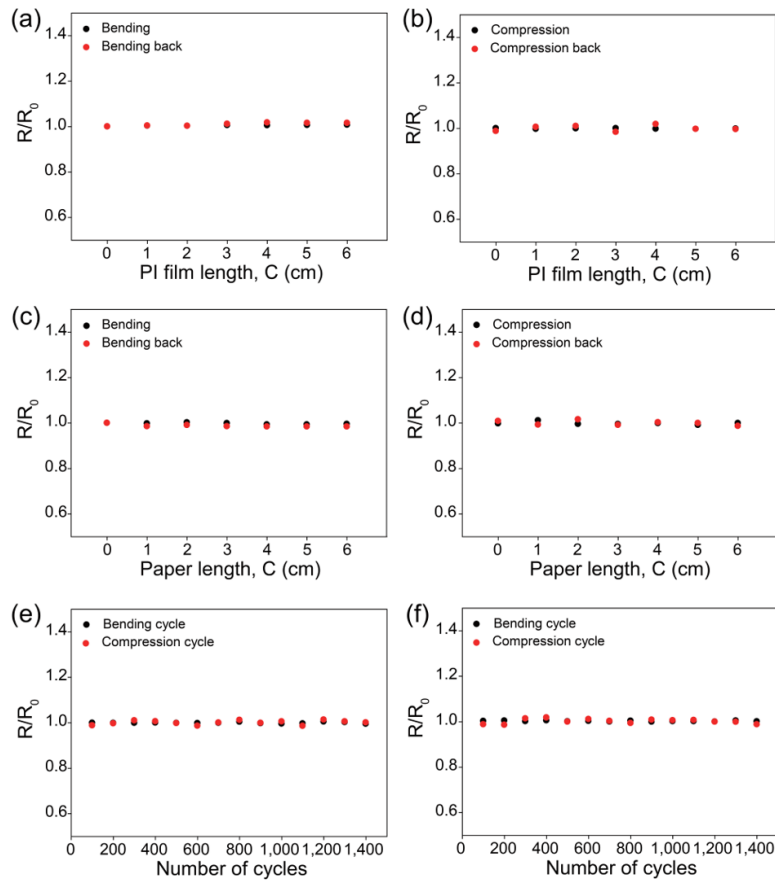

**Fig. S4** Bending and compressing tests for evaluating resistance of printed ex-Gr conductors on PI film (**a** and **b**) and paper (**c** and **d**) substrates. Fatigue test for evaluating resistance of bending and compressing over 1,400 cycles for printed ex-Gr conductors on PI film (**e**) and paper (**f**) substrates

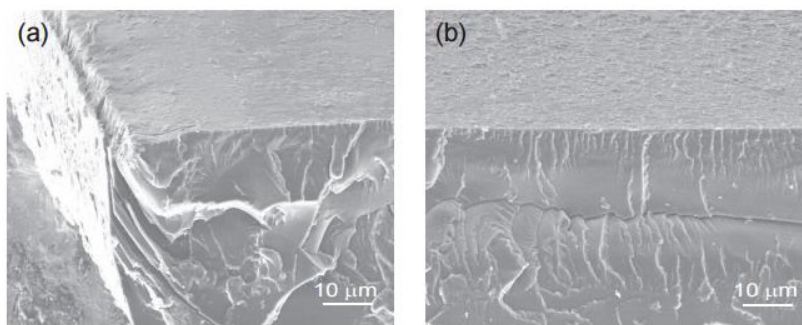

**Fig. S5** SEM images of the ex-Gr conductor after **a** bending and **b** fatigue tests

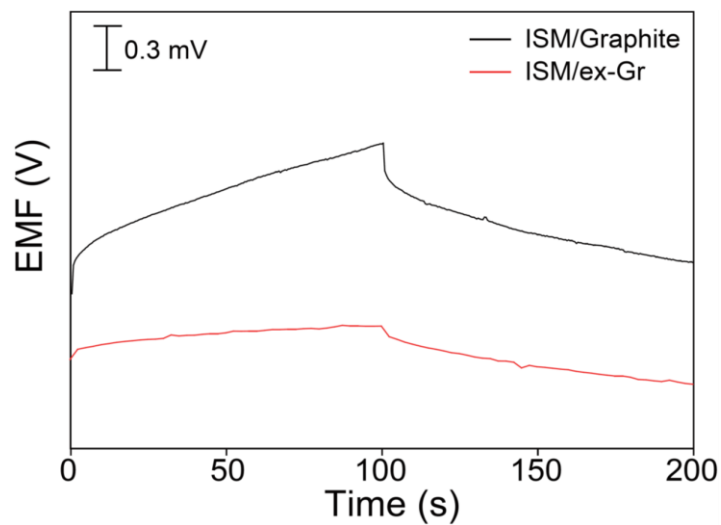

**Fig. S6** Chronopotentiograms for electrical double-layer capacitance and potential stability of ISM/Graphite and ISM/ex-Gr electrodes in 0.1 M NaCl solution

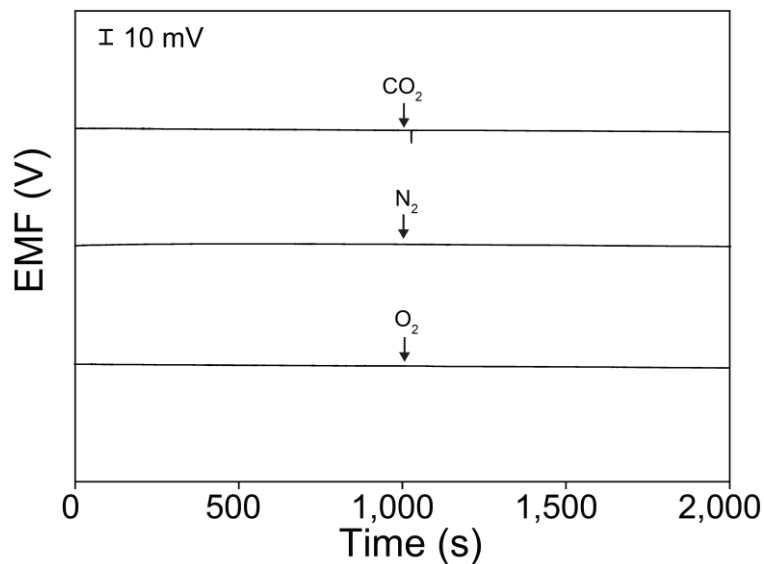

**Fig. S7** Effect of potential stability of ISM/ex-Gr electrode at CO<sub>2</sub>, N<sub>2</sub> and O<sub>2</sub> gas purging in 0.1 M NaCl solution

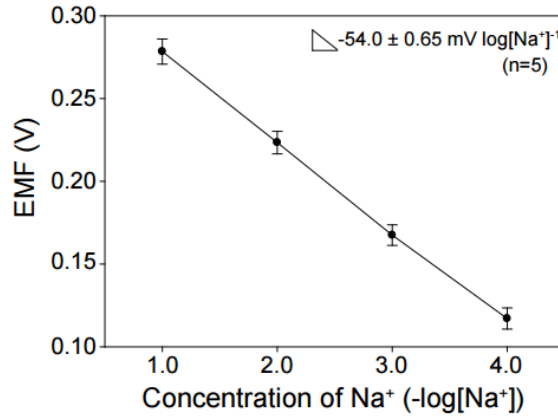

**Fig. S8** Reproducibility calibration curves of Na<sup>+</sup> sensors (n=5)

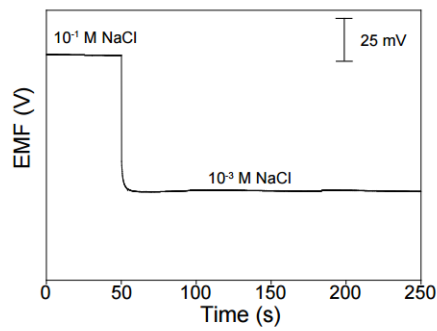

**Fig. S9** Response time of Na<sup>+</sup> sensor by subsequently adding 10<sup>-3</sup> M NaCl into 10<sup>-1</sup> M NaCl solution and measuring the change of EMF signals

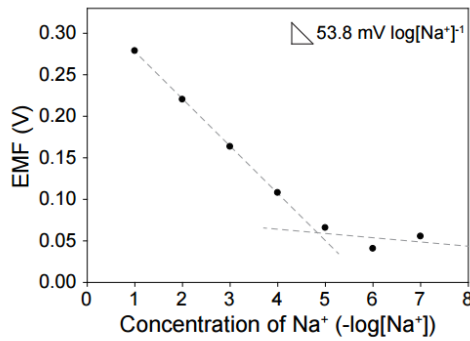

**Fig. S10** Calibration curve for evaluating detection limit of Na<sup>+</sup> sensor

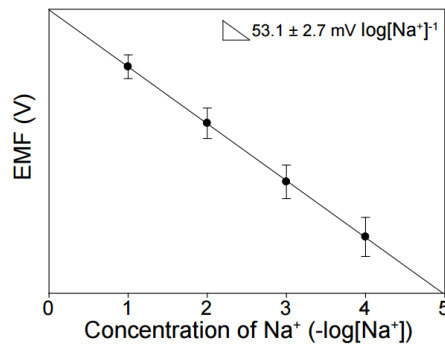

**Fig. S11** Calibration curve of Na<sup>+</sup> sensors (n = 5) according to diluting concentration of NaCl solution at different annealing temperature of 60, 100, 125 and 200 °C

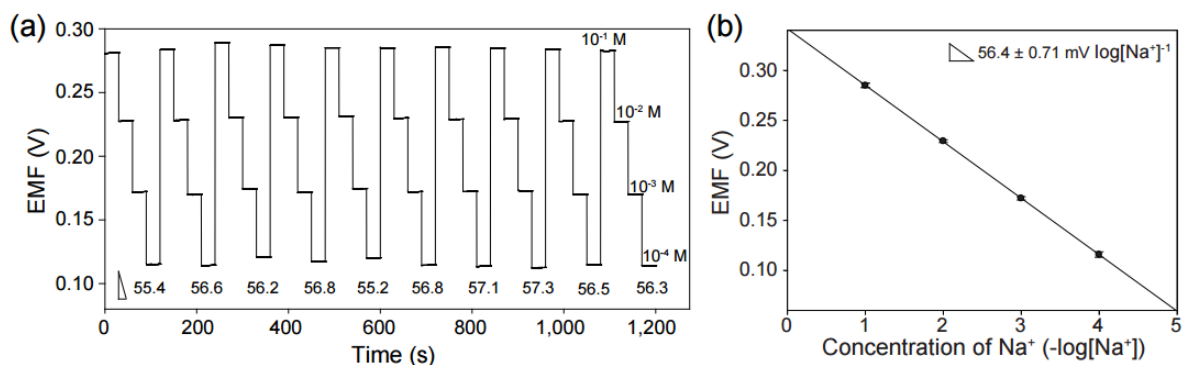

**Fig. S12 a** Reusability of Na<sup>+</sup> sensor by measuring EMF responses at 10<sup>-1</sup>–10<sup>-4</sup> M NaCl over 10 cycles with DI water washing at each cycle. **b** Calibration curves of Na<sup>+</sup> sensor obtained from reusability tests

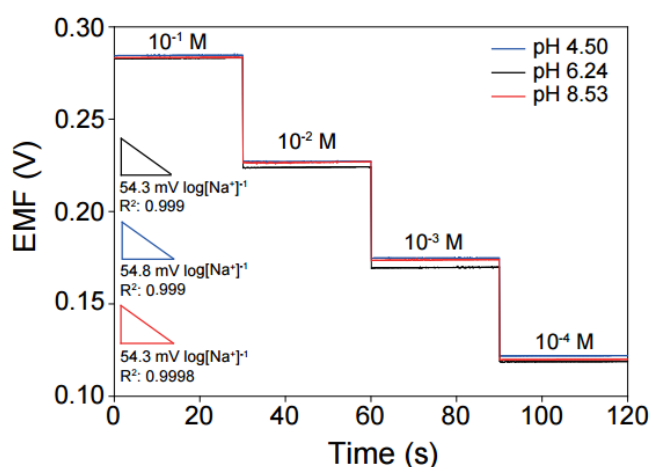

**Fig. S13** EMF responses of Na<sup>+</sup> sensor at different pH values of 4.50, 6.24, and 8.53 with the decreasing concentration of the Na<sup>+</sup> solution from 10<sup>-1</sup> to 10<sup>-4</sup> M

## Supplementary References

- [S1] K. R. Paton, E. Varrla, C. Backes, R. J. Smith, U. Khan et al., Scalable production of large quantities of defect-free few-layer graphene by shear exfoliation in liquids. *Nature Mater.* **13**, 624 (2014). <https://doi.org/10.1038/nmat3944>
- [S2] E. Varrla, K. R. Paton, C. Backes, A. Harvey, R. J. Smith et al., Turbulence-assisted shear exfoliation of graphene using household detergent and a kitchen blender. *Nanoscale* **6**, 11810 (2014). <https://doi.org/10.1039/C4NR03560G>
- [S3] J. Shang, F. Xue, E. Ding, The facile fabrication of few-layer graphene and graphite nanosheets by high pressure homogenization. *Chem. Commun.* **51**, 15811 (2015). <https://doi.org/10.1039/C5CC06151B>
- [S4] U. Khan, A. O'Neill, M. Lotya, S. De, J. N. Coleman, High-Concentration Solvent Exfoliation of Graphene. *Small* **6**, 864 (2010). <https://doi.org/10.1002/sml.200902066>
- [S5] M. Uz, M. T. Lentner, K. Jackson, M. S. Donta, J. Jung et al., Fabrication of two-dimensional and three-dimensional high-resolution binder-free graphene circuits using a microfluidic approach for sensor applications. *ACS Appl. Mater. Interfaces* **12**, 13529 (2020). <https://doi.org/10.1021/acsami.9b23460>
- [S6] P. He, J. Cao, H. Ding, C. Liu, J. Neilson et al., Screen-printing of a highly conductive graphene ink for flexible printed electronics. *ACS Appl. Mater. Interfaces* **11**, 32225 (2019). <https://doi.org/10.1021/acsami.9b04589>

- [S7] D. Joseph, S. Seo, D. R. Williams, K. E. Geckeler, Double-stranded DNA-graphene hybrid: preparation and anti-proliferative activity. *ACS Appl. Mater. Interfaces* **6**, 3347 (2014). <https://doi.org/10.1021/am405378x>
- [S8] L. Liu, Z. Xiong, D. Hu, G. Wu, P. Chen, Production of high quality single- or few-layered graphene by solid exfoliation of graphite in the presence of ammonia borane. *Chem. Commun.* **49**, 7890 (2013). <https://doi.org/10.1039/C3CC43670E>
- [S9] M. Lotya, P. J. King, U.; Khan, S. De, J. N. Coleman, High-concentration, surfactant-stabilized graphene dispersions. *ACS Nano* **4**, 3155 (2014). <https://doi.org/10.1021/nm1005304>
- [S10] L. Hauang, Y. Huang, J. Liang, X. Wan, Y. Chen, Graphene-based conducting inks for direct inkjet printing of flexible conductive patterns and their applications in electric circuits and chemical sensors. *Nano Res.* **4**, 675 (2011). <https://doi.org/10.1007/s12274-011-0123-z>
- [S11] F. Torrisi, T. Hasan, W. Wu, Z. Sun, A. Lombardo et al., Inkjet-printed graphene electronics. *ACS Nano* **6**, 2992 (2012). <https://doi.org/10.1021/nm2044609>
- [S12] D. J. Finn, M. Lotya, G. Cunningham, R. J. Smith, D. McCloskey et al., Inkjet deposition of liquid-exfoliated graphene and MoS<sub>2</sub> nanosheets for printed device applications. *J. Mater. Chem. C* **2**, 925 (2014). <https://doi.org/10.1039/C3TC31993H>
- [S13] Y. Gao, W. Shi, W. Wang, Y. Leng, Y. Zhao, Inkjet printing patterns of highly conductive pristine graphene on flexible substrates. *Ind. Eng. Chem. Res.* **53**, 16777 (2014). <https://doi.org/10.1021/ie502675z>
- [S14] F. Miao, S. Majee, M. Song, J. Zhao, S. Zhang et al., Inkjet printing of electrochemically-exfoliated graphene nano-platelets. *Synth. Met.* **220**, 318 (2016). <https://doi.org/10.1016/j.synthmet.2016.06.029>
- [S15] J. Li, F. Ye, S. Vaziri, M. Muhammed, M. C. Lemme et al., Efficient inkjet printing of graphene. *Adv. Mater.* **25**, 3985 (2013). <https://doi.org/10.1002/adma.201300361>
- [S16] Y. Xu, M. G. Schwab, A. J. Strudwick, I. Hennig, X. Feng et al., Screen-printable thin film supercapacitor device utilizing graphene/polyaniline inks. *Adv. Energy Mater.* **3**, 1035 (2013). <https://doi.org/10.1002/aenm.201300184>
- [S17] K. Arapov, E. Rubingh, R. Abbel, J. Laven, G. de With et al., Conductive screen printing inks by gelation of graphene dispersions. *Adv. Funct. Mater.* **26**, 586 (2016). <https://doi.org/10.1002/adfm.201504030>
- [S18] L. W. T. Ng, X. Zhu, G. Hu, N. Macadam, D. Um et al., Conformal printing of graphene for single- and multilayered devices onto arbitrarily shaped 3D surfaces. *Adv. Funct. Mater.* **29**, 1807933 (2019). <https://doi.org/10.1002/adfm.201807933>
- [S19] Y. Sui, A. Hess-Dunning, P. Wei, E. Pentzer, R. M. Sankaran et al., Electrically conductive, reduced graphene oxide structures fabricated by inkjet printing and low temperature plasma reduction. *Adv. Mater. Technol.* **4**, 1900834 (2019). <https://doi.org/10.1002/admt.201900834>
- [S20] E. B. Secor, T. Z. Gao, A. E. Islam, R. Rao, S. G. Wallace et al., Enhanced conductivity, adhesion, and environmental stability of printed graphene inks with nitrocellulose. *Chem. Mater.* **29**, 2332 (2017). <https://doi.org/10.1021/acs.chemmater.7b00029>
- [S21] H. Ding, P. He, J. Yang, C. Liu, H. Zho et al., Water-based highly conductive graphene inks for fully printed humidity sensors. *J. Phys. D: Appl. Phys.* **53**, 455304 (2020). <https://doi.org/10.1088/1361-6463/aba78a>
- [S22] H. Chen, Y. Zhang, Y. Ma, S. Chen, Y. Wu et al., Sand-milling exfoliation of structure controllable graphene for formulation of highly conductive and multifunctional graphene inks. *Adv. Mater. Interfaces* **8**, 2000888 (2020). <https://doi.org/10.1002/admi.202000888>



- [S23] K. Arapov, E. Rubingh, R. Abbel, J. Laven, G. de With et al., Conductive screen printing inks by gelation of graphene dispersions. *Adv. Funct. Mater.* **26**, 586 (2016). <https://doi.org/10.1002/adfm.201504030>
- [S24] S. Majee, M. Song, S.L. Zhang, Z.B. Zhang, Scalable inkjet printing of shear-exfoliated graphene transparent conductive films. *Carbon* **102**, 51 (2016). <https://doi.org/10.1016/j.carbon.2016.02.013>
- [S25] E.B. Secor, P.L. Prabhumirashi, K. Puntambekar, M.L. Geier, M.C. Hersam, Inkjet printing of high conductivity, flexible graphene patterns. *J. Phys. Chem. Lett.* **4**, 1347 (2013). <https://doi.org/10.1021/jz400644c>
